# Supplementary material for: <strong></strong>Cross-Cultural Adaptation and Validation of an Attitude about Euthanasia Scale in Portuguese Older Adults with Mixed Anxiety-Depressive Disorder
Source: Preprints.org preprint supplement (doi:10.20944/preprints202405.0372.v2), 2024-05-30
Supplement: Supplementary file 2 [file supplementary]

**Table S1.**

ITEMS ADJUSTED to EUROPEAN-PORTUGUESE WRITING

| Item number | Original items of AAEs | Adjusted and final items of the aAAEs |
| --- | --- | --- |
| 1 | É um absurdo manter uma pessoa com vida vegetativa através de aparelhagem artificial. *(It is absurd to maintain a person in a vegetative life through artificial devices.)* | É um absurdo manter uma pessoa em vida vegetativa através de aparelhos artificiais. *(It is absurd to maintain a person in a vegetative life through artificial devices.)* |
| 2 | Se existe condição de manter vivo um doente com recursos artificiais, mesmo por tempo indefinido, não se deve praticar a eutanásia. (*If there are conditions to keep a patient alive with artificial resources, even for an indefinite time, euthanasia should not be practiced.)* | Se existem condições para manter vivo um doente com recursos artificiais, mesmo que por tempo indefinido, não se deve praticar a eutanásia. (*If there are conditions to keep a patient alive with artificial resources, even for an indefinite time, euthanasia should not be practiced.)* |
| 3 | Não hesitaria em abreviar, sem dor ou sofrimento, a vida de um doente reconhecidamente condenado. *(I would not hesitate to abbreviate, without pain or suffering, the life of an admittedly condemned patient.)* | Não hesitaria em abreviar, sem dor nem sofrimento, a vida de um doente reconhecidamente condenado. *(I would not hesitate to abbreviate, without pain or suffering, the life of an admittedly condemned patient.)* |
| 4 | A prática da eutanásia é uma violência camuflada. *(The practice of euthanasia is a camouflaged violence.)* | A prática da eutanásia é uma violência camuflada. *(The practice of euthanasia is a camouflaged violence.)* |
| 5 | A eutanásia é um direito do Homem. *(Euthanasia is a right of Humankind.)* | A eutanásia é um direito do Homem. *(Euthanasia is a right of Humankind.)* |
| 6 | O Homem não deve ter o direito de abreviar a vida de outro, nem para poupá-lo de sofrimentos maiores que o levarão irremediavelmente à morte. *(Humankind should not have the right to abbreviate the life of another, not even to spare them from greater suffering that will irremediably lead to death.)* | O Homem não deve ter o direito de abreviar a vida de outro, nem para poupá-lo de sofrimentos maiores que o levarão irremediavelmente à morte. *(Humankind should not have the right to abbreviate the life of another, not even to spare them from greater suffering that will irremediably lead to death.)* |
| 7 | Não me sentiria culpado permitindo a eutanásia em um de meus familiares que estivesse desenganado e sofrendo terrivelmente. *(I would not feel guilty allowing the euthanasia of one of my family members with hopeless and terrible suffering.)* | Não me sentiria culpado permitindo a eutanásia de um dos meus familiares que estivesse desenganado e a sofrer terrivelmente. *(I would not feel guilty allowing the euthanasia of one of my family members with hopeless and terrible suffering.)* |
| 8 | É cobardia optar pela eutanásia. *(It is cowardice to choose euthanasia.)* | É cobardia optar pela eutanásia. *(It is cowardice to choose euthanasia.)* |
| 9 | A eutanásia deve ser praticada em situações definidas, simplesmente, por razões humanitárias. *(Euthanasia should be practiced in defined situations, simply for humanitarian reasons.)* | A eutanásia deve ser praticada em situações definidas, simplesmente, por razões humanitárias. *(Euthanasia should be practiced in defined situations, simply for humanitarian reasons.)* |
| 10 | Deve-se manter o doente incurável, o tempo necessário, apenas com paliativos em vez de apressar-lhe a morte. *(The incurable patient should be maintained for as long as necessary, only with palliative care instead of abbreviating their death.)* | Deve-se manter o doente incurável, o tempo que for preciso, apenas com paliativos em vez de lhe abreviar a morte. *(The incurable patient should be maintained, for as long as necessary, only with palliative care instead of abbreviating their death.)* |
| 11 | Abreviar com a morte os sofrimentos de alguém que se ama é, antes de tudo, um ato de humanidade. *(Abbreviating the suffering of someone you love with death is, above all, an act of humanity.)* | Abreviar com a morte os sofrimentos de alguém que se ama é, antes de tudo, um ato de humanidade. *(Abbreviating the suffering of someone you love with death is, above all, an act of humanity.)* |
| 12 | A família que realmente ama o doente nunca autoriza a eutanásia. *(The family that really loves the patient never authorizes euthanasia.)* | A família que realmente ama o doente nunca autoriza a eutanásia. *(The family that really loves the patient never authorizes euthanasia.)* |
| 13 | Uma legislação especial permitindo a prática a eutanásia seria uma conquista da humanidade. *(A special legislation allowing the practice of euthanasia would be an achievement of humanity.)* | Uma legislação especial permitindo a prática a eutanásia seria uma conquista da humanidade. *(A special legislation allowing the practice of euthanasia would be an achievement of humanity.)* |
| 14 | Aquele que pensa saber a hora certa para alguém deixar de viver se julga Todo-Poderoso. *(Those who think knowing the right time for someone to stop living think they are Almighty.)* | Aquele que pensa saber a hora certa para alguém deixar de viver julga-se Todo-Poderoso. *(Those who think knowing the right time for someone to stop living think they are Almighty.)* |
| 15 | Se o doente não está mais lúcido e a família assumir a decisão, a eutanásia deve ser praticada. *(If the patient is no longer lucid and the family assumes the decision, euthanasia should be practiced.)* | Se o doente não está mais lúcido e a família assumir a decisão, a eutanásia deve ser praticada. *(If the patient is no longer lucid and the family assumes the decision, euthanasia should be practiced.)* |
| 16 | Por motivos vários não deve haver uma legislação especial permitindo a prática da eutanásia. *(For various reasons, there should be no special legislation allowing the practice of euthanasia.)* | Por motivos vários não deve haver uma legislação especial permitindo a prática da eutanásia. *(For various reasons, there should be no special legislation allowing the practice of euthanasia.)* |
| 17 | Há certas circunstâncias em que a pessoa tem todo o direito de decidir se quer ou não continuar esperando a morte. *(There are certain circumstances in which a person has every right to decide whether to continue waiting for death.)* | Há certas circunstâncias em que a pessoa tem todo o direito de decidir se quer ou não continuar à espera da morte. *(There are certain circumstances in which a person has every right to decide whether to continue waiting for death.)* |
| 18 | O direito de vida e o direito de morte escapam, sob qualquer circunstância, ao âmbito de decisão do Ser Humano. *(The right to life and the right to death escape, under any circumstances, the scope of decision of the Human Being.)* | O direito de vida e o direito de morte escapam, sob qualquer circunstância, ao âmbito de decisão do Ser Humano. *(The right to life and the right to death escape, under any circumstances, the scope of decision of the Human Being.)* |
| 19 | Ter direito à eutanásia é ter direito a uma morte digna. *(Having the right to euthanasia is having the right to a dignified death.)* | Ter direito à eutanásia é ter direito a uma morte digna. *(Having the right to euthanasia is having the right to a dignified death.)* |
| 20 | Praticar a eutanásia é matar por amor, mas não deixa de ser assassinato. *(Practicing euthanasia is killing for love, but it is still murder.)* | Praticar a eutanásia é matar por amor, mas não deixa de ser assassinato. *(Practicing euthanasia is killing for love, but it is still murder.)* |
| 21 | É um crime manter um ser humano em vida puramente vegetativa. *(Keeping a human being in a purely vegetative life is a crime.)* | É um crime manter um ser humano em vida puramente vegetativa. *(Keeping a human being in a purely vegetative life is a crime.)* |
| 22 | A eutanásia não se aplica a nenhum caso, pois cada doente reage de forma diferente a uma mesma doença. *(Euthanasia does not apply to any case, as each patient reacts differently to the same disease.)* | A eutanásia não se aplica a nenhum caso, pois cada doente reage de forma diferente a uma mesma doença. *(Euthanasia does not apply to any case, as each patient reacts differently to the same disease.)* |
| 23 | Uma legislação especial permitindo a prática da eutanásia deveria ser ampla, abrangendo o maior número de casos incuráveis e fatais. *(Special legislation allowing the practice of euthanasia should be broad, covering the greatest number of incurable and fatal cases.)* | Uma legislação especial permitindo a prática da eutanásia deveria ser ampla, abrangendo o maior número de casos incuráveis e fatais. *(Special legislation allowing the practice of euthanasia should be broad, covering the greatest number of incurable and fatal cases.)* |
| 24 | Quem autoriza a morte de um parente, na verdade, está querendo aliviar sua própria dor. *(Whoever authorizes the death of a relative truly want to alleviate their own pain.)* | Quem autoriza a morte de um parente, na verdade, quer aliviar a sua própria dor. *(Whoever authorize the death of a relative truly want to alleviate their own pain.)* |
| 25 | Se o desligamento da aparelhagem artificial não resolver, deve ser aplicada uma injeção que adiante a morte do condenado. *(If turning off the artificial equipment does not solve the problem, an injection must be applied to anticipate the death of the condemned patient.)* | Se desligar as máquinas de suporte artificial à vida não resolver, deve ser aplicada uma injeção que adiante a morte do condenado. *(If turning off the artificial life support machines does not solve the problem, an injection must be applied to anticipate the death of the condemned patient.)* |
| 26 | O sofrimento do doente incurável faz parte de sua missão na Terra, por isso a eutanásia não deve ser praticada. *(The suffering of the incurable patient is part of their mission on Earth, so euthanasia should not be practiced.)* | O sofrimento do doente incurável faz parte da sua missão na Terra, por isso a eutanásia não deve ser praticada. *(The suffering of the incurably ill is part of their mission on Earth, so euthanasia should not be practiced.)* |

AAEs: attitude about euthanasia scale; aAAEs: adapted attitude about euthanasia scale
